# Supplementary material for: UV to NIR photodetection in lateral homojunction PN diode of WSe2 achieved via IGZO sputtering
Source: Royal Society of Chemistry journal article supplement (doi:10.1039/d4tc04705b), 2025-01-01
Supplement: d4tc04705b1.pdf [file d4tc04705b1.pdf]

## Supporting Information

### UV to NIR Photodetection in Lateral Homojunction PN Diode of WSe<sub>2</sub>

#### Achieved by IGZO Sputtering

Muhammad Abubakr<sup>1,2,#</sup>, Muhammad Hamza Pervez<sup>3,#</sup>, Arslan Rehmat<sup>4,#</sup>, Muhammad Asghar Khan<sup>4</sup>, Ehsan Elahi<sup>4</sup>, Muhammad Asim<sup>4</sup>, Muhammad Rabeel<sup>1</sup>, Muhammad Nasim<sup>3</sup>, Zeesham Abbas<sup>5</sup>, Malik Abdul Rehman<sup>6</sup>, Aize Hao<sup>7</sup>, Eom Jonghwa<sup>3</sup>, Shania Rehman<sup>3\*</sup>, Muhammad Farooq Khan<sup>1\*</sup>

<sup>1</sup>*Department of Materials Engineering and Convergence Technology, Gyeongsang National University, Jinju, Gyeongsangnam-do 52828, Republic of Korea*

<sup>2</sup>*Department of Optical Engineering, Sejong University, Seoul, 05006, Republic of Korea*

<sup>3</sup>*Department of Semiconductor Systems Engineering, Sejong University, Seoul, 05006, Republic of Korea*

<sup>4</sup>*Department of Physics & Astronomy, Sejong University, Seoul, 05006, Republic of Korea*

<sup>5</sup>*Department of Nanotechnology and Advanced Materials Engineering, Sejong University, Seoul, 05006, Republic of Korea*

<sup>6</sup>*Department of Chemical Engineering, New Uzbekistan University, Tashkent 100007, Uzbekistan*

<sup>7</sup>*College of Chemical Engineering, Sichuan University of Science and Engineering, Zigong 643000, Sichuan, PR China*

# These authors contributed equally

\* Corresponding Author: [mfk@sejong.ac.kr](mailto:mfk@sejong.ac.kr) and [shania.rehman19@sejong.ac.kr](mailto:shania.rehman19@sejong.ac.kr)

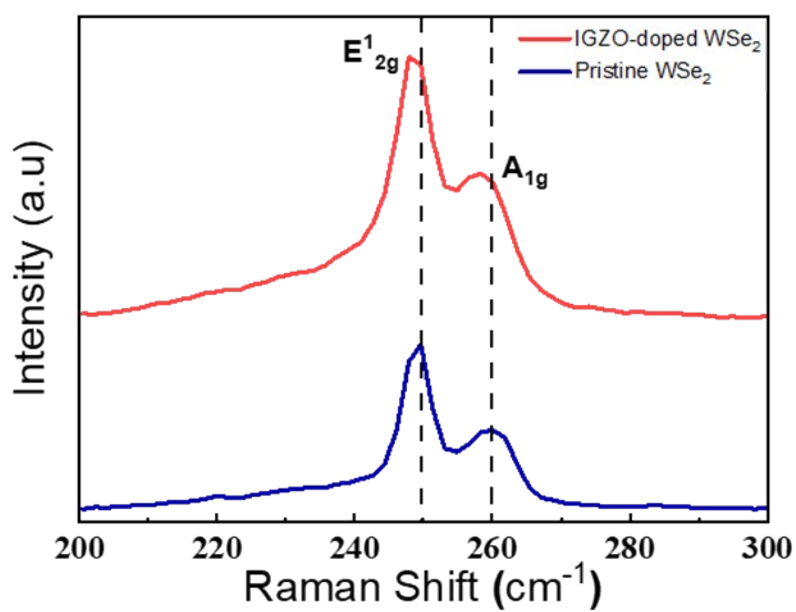

**Figure S1.** The Raman spectrum of WSe<sub>2</sub> and IGZO/WSe<sub>2</sub> flakes at ambient condition.

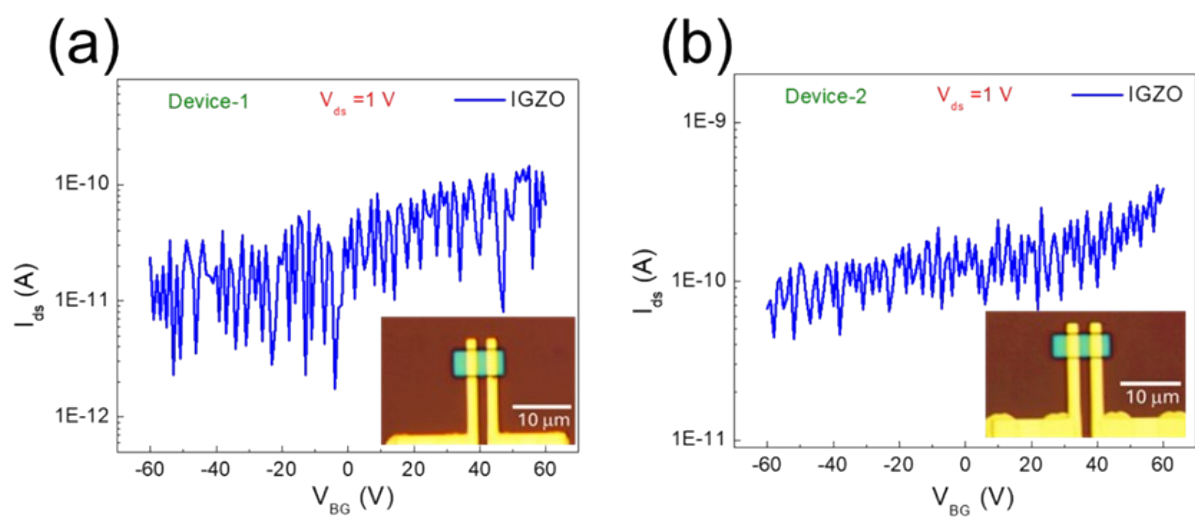

**Figure S2.** Transfer curves ( $I_{ds}$ - $V_{BG}$ ) of sputtered IGZO on Si/SiO<sub>2</sub> substrate **(a)** device-1 and **(b)** device-2.

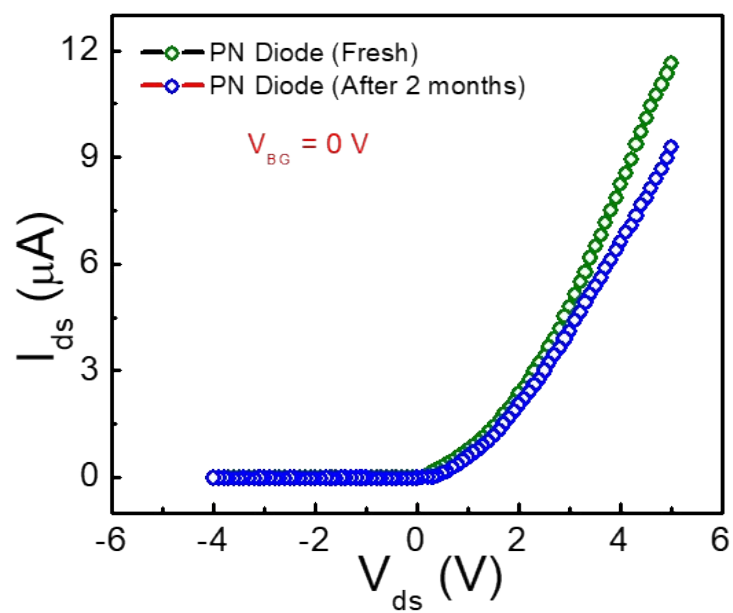

**Figure S3.** PN homo-diode (p-WSe<sub>2</sub>/n-IGZO.WSe<sub>2</sub>) curves of fresh and after two months.
